# Supplementary material
Source: Springer Nature journal article supplement (https://www.springermedizin.de/resource/supplementary/12984_2005_44_MOESM2_ESM.pdf/9605190)

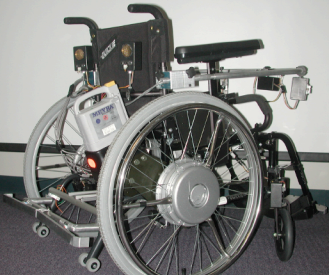

Supplement: MOESM2 [file 9605190]
